# Supplementary material
Source: HighWire-hosted journal article supplement (https://jnm.snmjournals.org/highwire/filestream/93902/field_highwire_adjunct_files/1/42838SupplementalFigure1.pdf)

# Supplementary Figure 1

## Human CPC

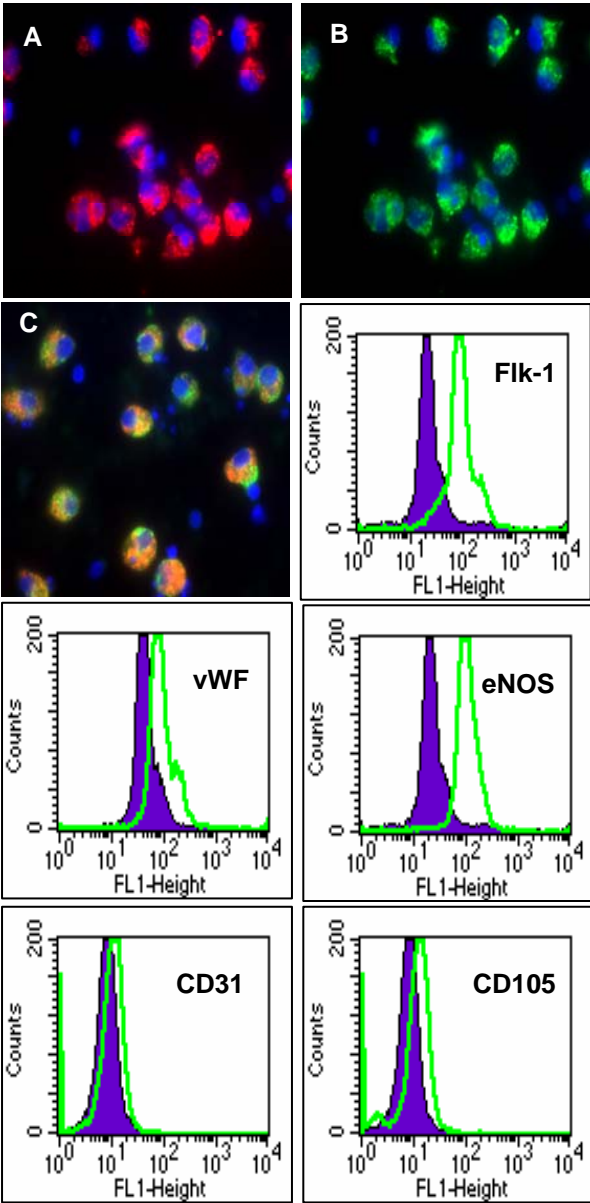

## Porcine CPC

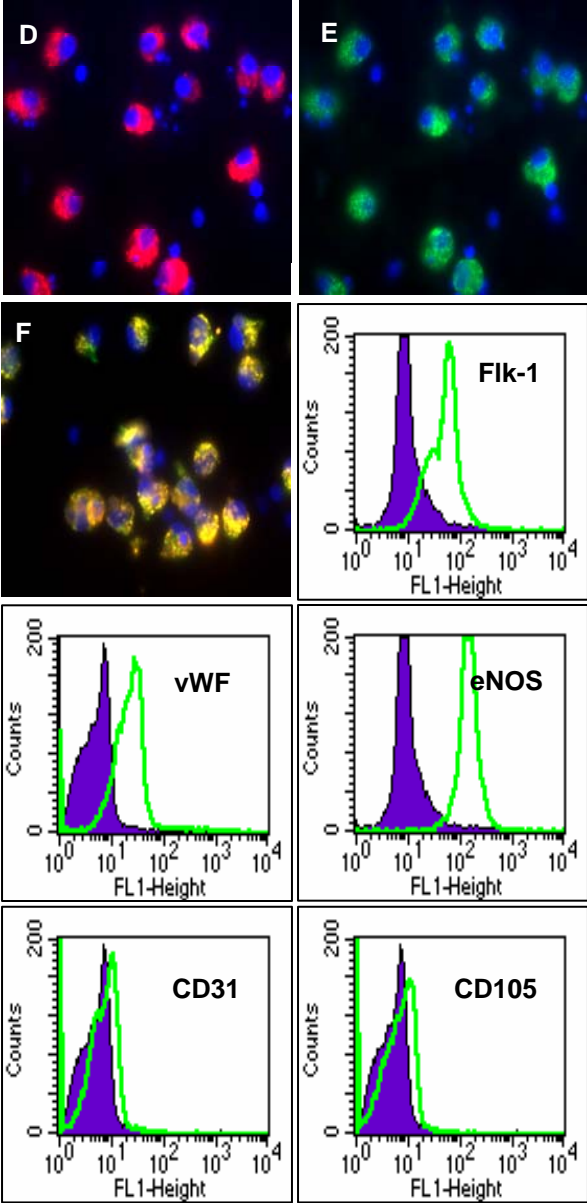

Supplement: 42838SupplementalFigure1.pdf [file 42838SupplementalFigure1.pdf]
